# Supplementary material for: Bandgap renormalization and work function tuning in MoSe2/hBN/Ru(0001) heterostructures
Source: PubMed Central journal article supplement (PMC5171833; doi:10.1038/ncomms13843), 2016-12-14
Supplement: ncomms13843-s1.pdf [file ncomms13843-s1.pdf]

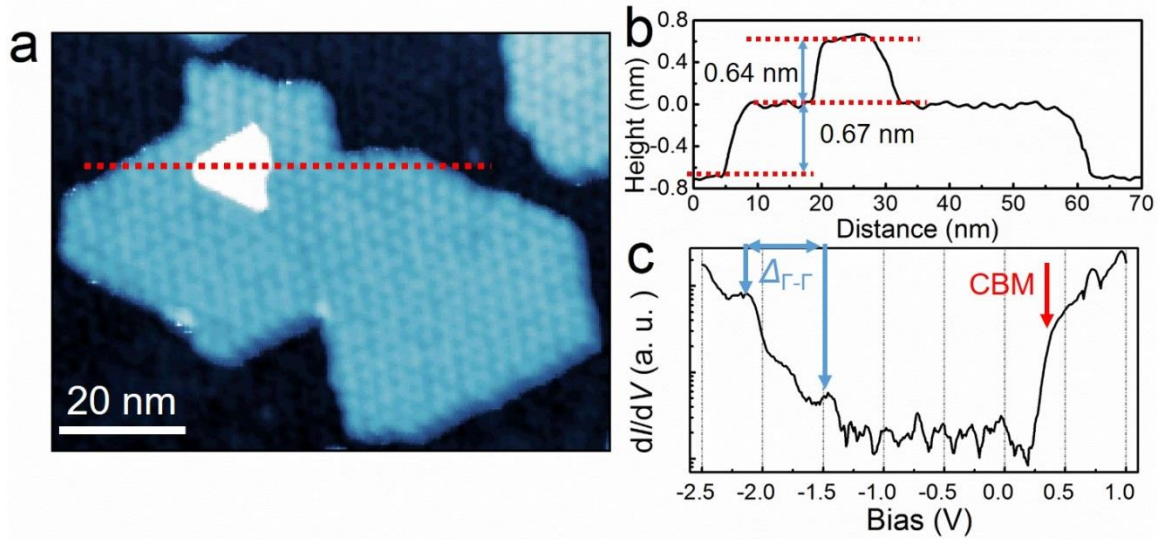

**Supplementary Figure 1. STM image and spectrum of DL-MoSe<sub>2</sub>.** (a) STM image of a relatively small DL-MoSe<sub>2</sub> on top of a large single-layer MoSe<sub>2</sub>. ( $V_b=3$  V,  $I_t=5$  pA,  $89$  nm  $\times$   $69$  nm) (b) Height profile along the red dashed line in (a). The apparent heights of SL-MoSe<sub>2</sub> and the second layer MoSe<sub>2</sub> are  $0.64$  nm and  $0.67$  nm, respectively. (c)  $dI/dV$  spectrum in logarithm scale indicates the  $\Delta_{\Gamma-\Gamma}$  splitting equals to  $0.68$  eV for the DL-MoSe<sub>2</sub>.

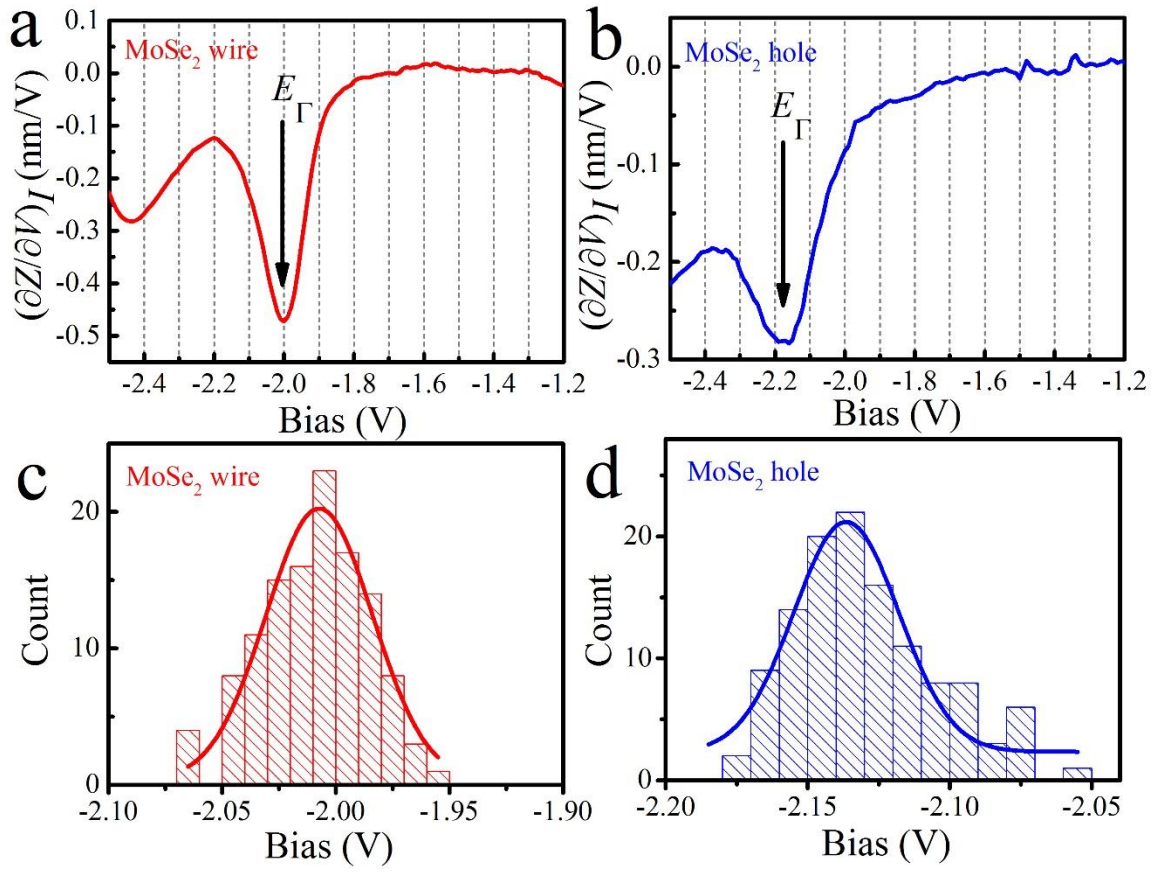

**Supplementary Figure 2.  $(\partial Z/\partial V)_I$  spectra and statistical distributions of the  $\Gamma$  points.**

(a,b) Individual  $(\partial Z/\partial V)_I$  spectra taken from MoSe<sub>2</sub> hole and MoSe<sub>2</sub> wire locations, respectively. The black arrows indicated the energy locations of the  $\Gamma$  points<sup>1,2</sup>. (c,d) Statistical distributions for  $\Gamma$  points of wire and hole, respectively (based on 120 individual  $(\partial Z/\partial V)_I$  spectra).  $\Gamma_V^H = -2.14 \pm 0.03$  eV,  $\Gamma_V^W = -2.01 \pm 0.02$  eV

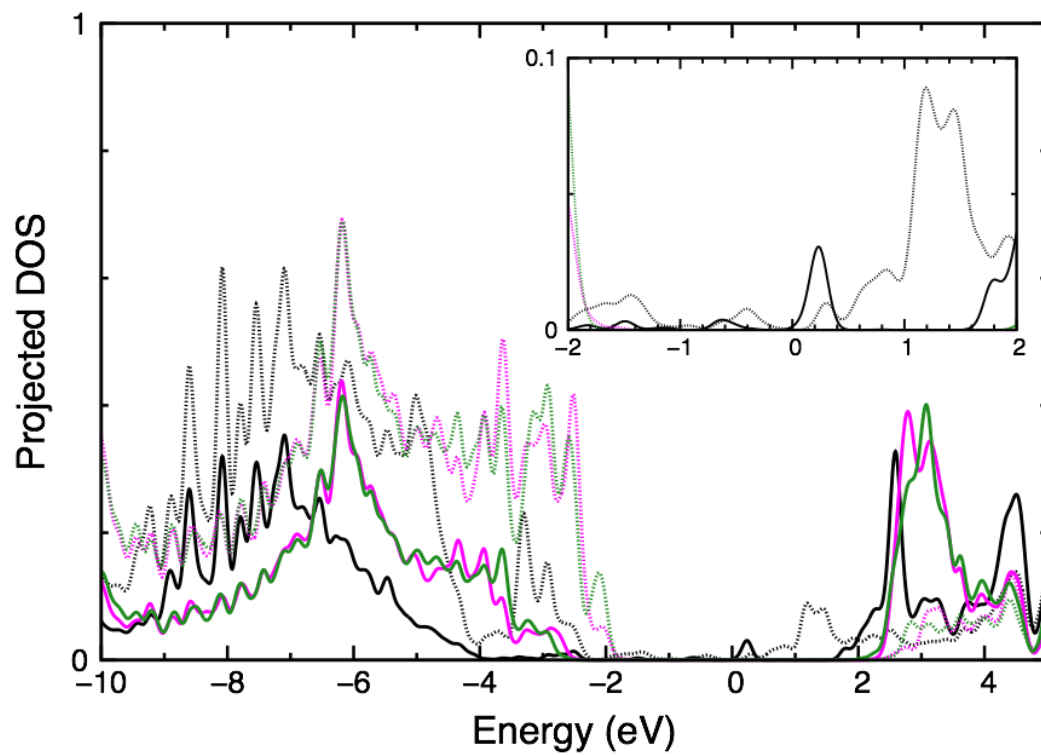

**Supplementary Figure 3.** Projected density of states on the p orbitals of B (solid lines) and N (dotted lines) atoms in the regions indicated by the black, green, and purple circles in Figure 4a. The Fermi level is set as the zero energy.

## Supplementary References

1. Zhang, C. et al. Probing Critical Point Energies of Transition Metal Dichalcogenides: Surprising Indirect Gap of Single Layer WSe<sub>2</sub>. *Nano Lett.* **15**, 6494-6500 (2015).
2. Zhang, C. et al. Visualizing band offsets and edge states in bilayer-monolayer transition metal dichalcogenides lateral heterojunction. *Nat. Commun.* **7**, 10349 (2016).
